# Supplementary material for: Two fatty acyl reductases involved in moth pheromone biosynthesis
Source: PubMed Central journal article supplement (PMC4947906; doi:10.1038/srep29927), 2016-07-18
Supplement: srep29927-s1.pdf [file srep29927-s1.pdf]

## **Supporting information**

**Two *fatty acyl reductases* involved in moth pheromone biosynthesis**

**Antony, B., Ding, B-J., Moto, K-I., Aldosari, S.A. and Aldawood, A.S.**

**Fig. S1.** Quantitative PCR results showing relative expression of SexpgFAR I and SexpgFAR II in the pheromone gland of 2-3d old female moth at mid-scotophase. The actin gene expression is used to normalize the gene expression level in the PG and used as control gene. In the analysis of the relative pgFAR expression change in, the actin gene was taken as the calibrator. The mean relative expression scores were calculated from the raw cycle threshold ( $\Delta C_T$ ) values. The transcripts with same letters are not significantly different ( $P < 0.05$ ).

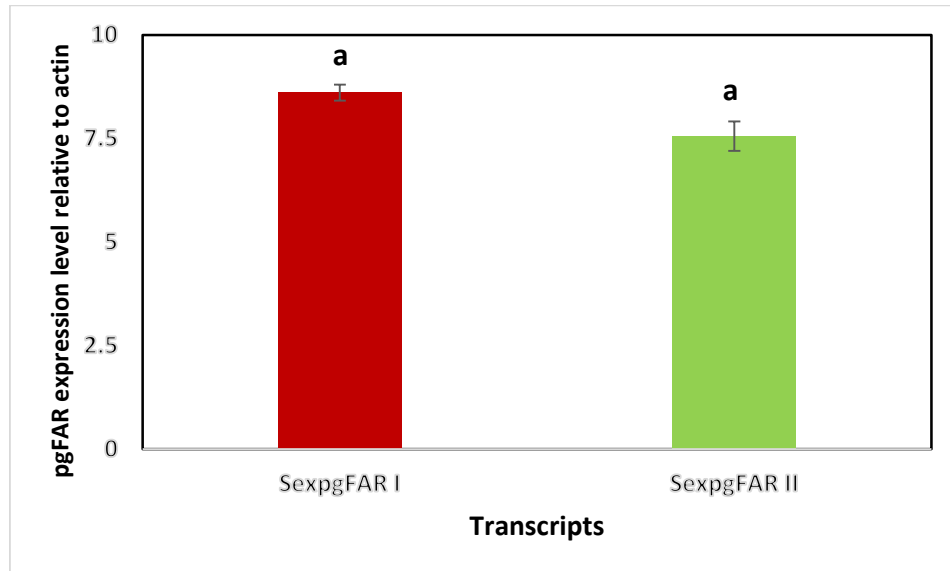

**Fig. S2.** Functional assay and GC-MS analysis of yeast (*InvSc1*) transformed with the pgFAR construct and supplemented with 0.5 mM C14:COOMe and C16:COOMe (A), Z11-16:COOMe (B) and E14-16:COOMe (C). The total ion chromatogram (TIC) shows the fatty alcohol products extracted from the yeast cells after a 48 h incubation at 30 °C and 300 rpm. Yeast cells transformed with an empty vector (negative control) or *B. mori* pgFAR (positive control)<sup>16</sup> ensured that the production of alcohol in yeast cells was due to the recombinant pgFAR gene. RT: retention time; IS: internal standard (250 ng 15:OAc). The authentic standards used in this assay were 16:OH, 14:OH, Z11-16:OH and E14-16:OH.

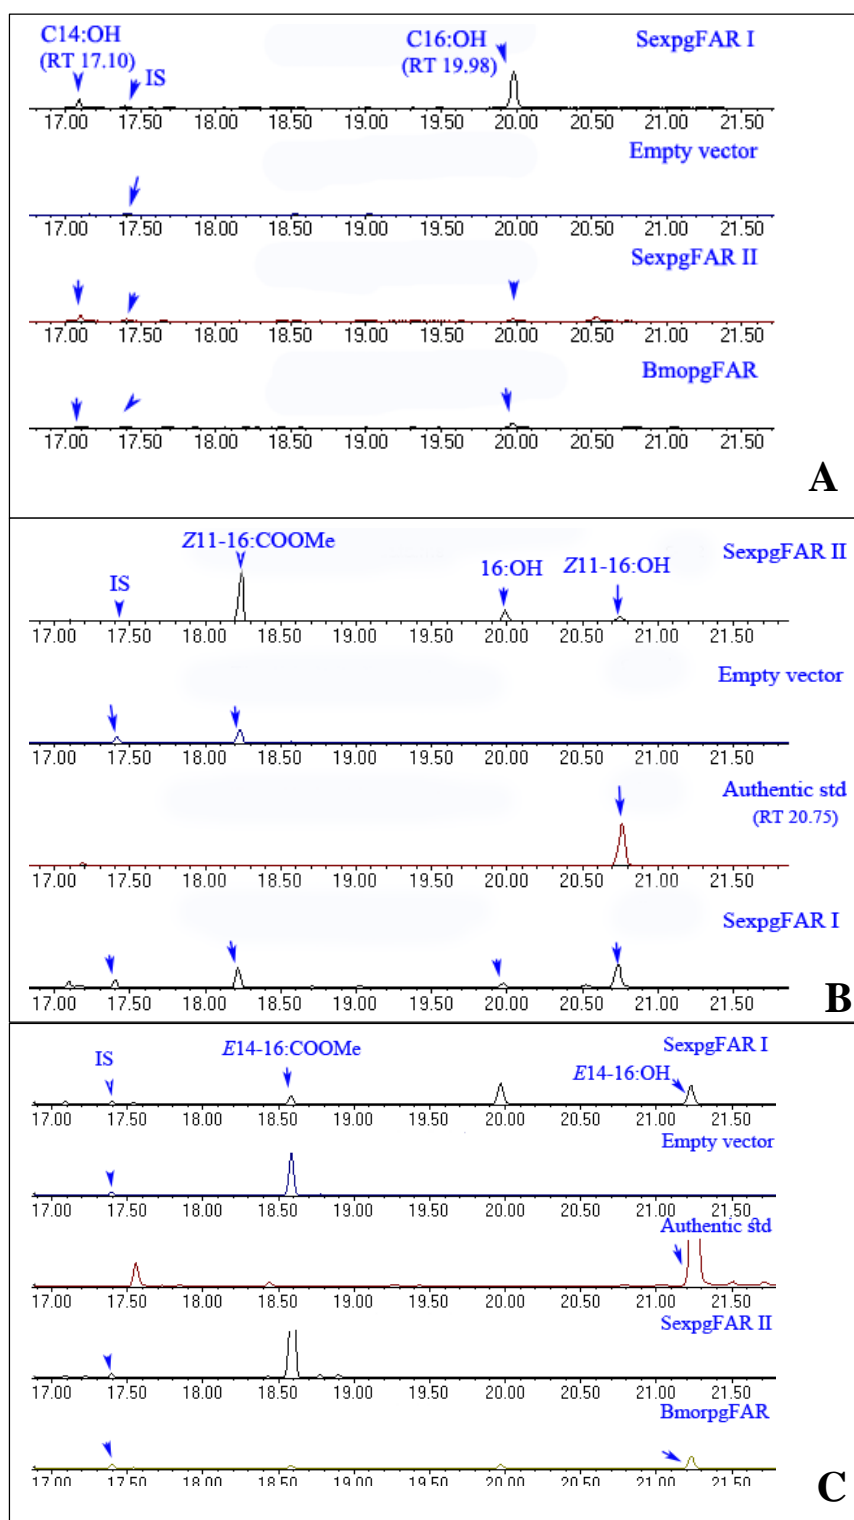

**Fig. S3A-H.** Functional assay and GC-MS analysis of yeast (*InvSc1*) transformed with the pgFAR construct and supplemented with 0.5 mM *E*11-14:COOMe (**A**), *Z*9-14:COOMe (**B**), *Z*11-14:COOMe (**C**), *Z*9*Z*11-14:COOMe (**D**), *Z*9*E*12-14:COOMe (**E**), *Z*9*E*11-14:COOMe (**F**), *E*10*E*12-14:COOMe (**G**) and *Z*9*Z*12-14:COOMe (**H**). Yeast cells transformed with the empty vector (negative control) ensured that the production of alcohol in yeast cells was due to the recombinant pgFAR gene. The authentic standards used in this experiment were *E*11-14:OH (**A**), *Z*9-14:OH (**B**), *Z*11-14:OH (**C**), *Z*9*Z*11-14:OH (**D**), *Z*9*E*12-14:OH (**E**), *Z*9*E*11-14:OH (**F**), *E*10*E*12-14:OH (**G**) and *Z*9*Z*12-14:OH (**H**).

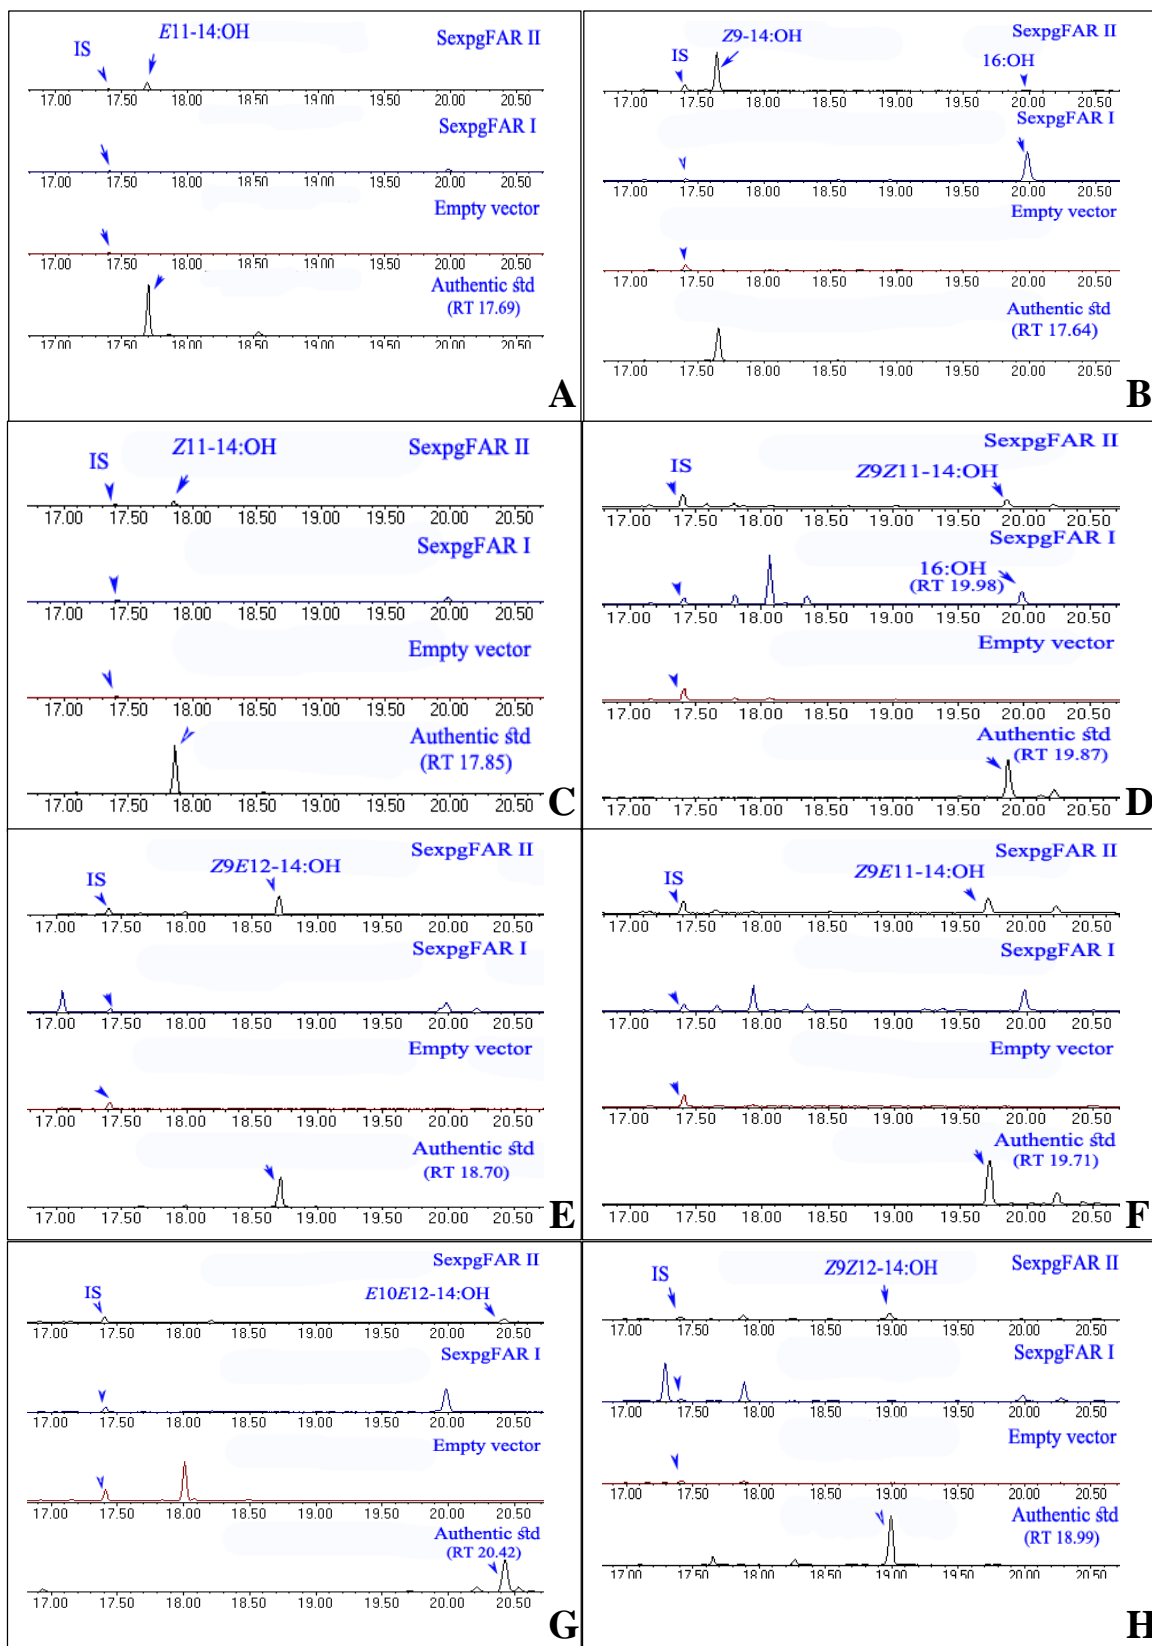

**Fig. S4.** Functional assay and GC-MS analysis of yeast (*InvSc1*) transformed with the pgFAR construct and supplemented with 0.5 mM *E12-14:COOMe* and *Z12-14:COOMe*. The total ion chromatogram (TIC) shows the fatty alcohol products that were extracted from the yeast cells after a 48 h incubation at 30 °C and 300 rpm. Yeast cells transformed with the empty vector (negative control) ensured that the production of alcohol in the yeast cells was due to the recombinant pgFAR gene. RT: retention time; IS: internal standard (250 ng 15:OAc). The authentic standards used in this experiment were *E12-14:OH* and *Z12-14:OH* (Pherobank, The Netherlands).

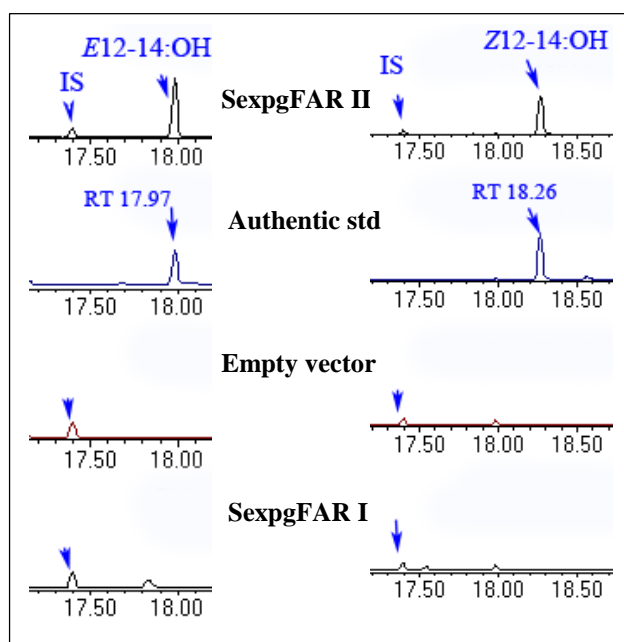

**Fig. S5.** Functional assay and GC-MS analysis of yeast (*InvSc1*) transformed BmopgFAR construct supplemented with a blend of equal concentration (0.5 mM total) of C14: COOMe, *E*11-14:COOMe, *Z*9-14:COOMe, *Z*11-14:COOMe, *Z*9*Z*11-14:COOMe, *Z*9*E*12-14:COOMe, *Z*9*E*11-14:COOMe, *E*10*E*12-14:COOMe and *Z*9*Z*12-14:COOMe in 5mL selective media. Total ion chromatogram (TIC) showing fatty alcohol products extracted from yeast cells after 48 h incubation at 30 °C, 300rpm. RT: retention time; IS: internal standard (250 ng 15:OAc). *B. mori* pgFAR reduces 14:acid and 16:acid compounds naturally present in the yeast, reduced to alcohol.

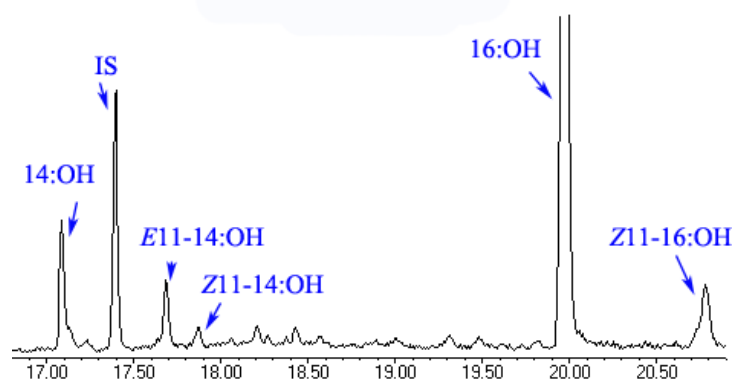

**Table S1:** List of the *Spodoptera* species with pheromone compounds identified.

| No. | <i>Spodoptera</i> species                            | Pheromone compound                                                                                             | Reference |
|-----|------------------------------------------------------|----------------------------------------------------------------------------------------------------------------|-----------|
| 1   | <i>Spodoptera androgea</i>                           | Z9-14:OAc<br>Z9E12-14:OAc                                                                                      | 1         |
| 2   | <i>Spodoptera cilium</i> Guenée                      | Z9E12-14:OAc                                                                                                   | 2         |
| 3   | <i>Spodoptera depravata</i> Butler                   | Z9E12-14:OAc<br>Z9-14:OAc                                                                                      | 3         |
| 4   | <i>Spodoptera descoinsi</i> Lalanne Cassou & Silvain | Z9-14:OAc<br>Z11-14:OAc<br>Z9E12-14:OAc<br>E9E12-14:OAc<br>Z9E11-14:OAc<br>Z11-16:OAc<br>Z9-14:Ald             | 4         |
| 5   | <i>Spodoptera dolichos</i> Fabricius                 | Z9-14:OAc<br>Z9E12-14:OAc                                                                                      | 1         |
| 6   | <i>Spodoptera eridania</i> Stoll                     | Z9-14:OAc<br>Z9E12-14:OAc<br>Z9Z12-14:OAc<br>Z9E11-14:OAc<br>Z11-16:OAc<br>Z9-14:OH                            | 5         |
| 7   | <i>Spodoptera evanida</i> Guenée                     | Z9-14:OAc<br>Z9E12-14:OAc                                                                                      | 1         |
| 8   | <i>Spodoptera exempta</i> Walker                     | Z9-14:OAc<br>Z9E12-14:OAc<br>Z9-14:Ald<br>Z9-14:OH<br>Z11-16:OAc<br>Z11-14:OAc                                 | 6         |
| 9   | <i>Spodoptera exigua</i> Hübner                      | Z9E12-14:OAc<br>Z9-14:OAc<br>Z11-16:OAc<br>Z9E12-14:OH<br>Z9-14:OH<br>Z11-16:OH                                | 7         |
| 10  | <i>Spodoptera frugiperda</i> Smith                   | Z7-12:OAc<br>E7-12:OAc<br>12:OAc<br>Z9-12:OAc<br>Z9-14:OAc<br>Z10-14:OAc<br>14:OAc<br>Z11-16:OAc<br>Z11-14:OAc | 8         |



|    |                                         |                                                                                                    |    |
|----|-----------------------------------------|----------------------------------------------------------------------------------------------------|----|
| 11 | <i>Spodoptera latifascia</i> Walker     | Z9-12:OAc<br>Z11-14:OAc<br>Z9E12-14:OAc<br>E9E12-14:OAc<br>Z9E11-14:OAc<br>Z11-16:OAc<br>Z9-14:Ald | 4  |
| 12 | <i>Spodoptera littoralis</i> Boisduval  | Z9E11-14:OAc<br>Z9-14:OAc<br>E11-14:OAc<br>14:OAc<br>Z11-14:OAc<br>Z9E12-14:OAc<br>E10E12-14:OAc   | 9  |
| 13 | <i>Spodoptera litura</i> Fabricius      | Z9E11-14:OAc<br>Z9E12-14:OAc<br>Z9-14:OAc<br>E11-14:OAc                                            | 10 |
| 14 | <i>Spodoptera pectinicornis</i> Hampson | Z7-12:OAc                                                                                          | 11 |
| 15 | <i>Spodoptera praefica</i> Grote        | Z7-12:OAc<br>Z7-12:OH<br>Z9-14:OAc<br>Z11-16:OAc                                                   | 12 |
| 16 | <i>Spodoptera sunia</i> Guenée          | Z9-14:OAc<br>Z9E12-14:OAc<br>Z9-14:OH<br>Z11-16:OAc                                                | 13 |
| 17 | <i>Spodoptera triturrata</i> Walker     | Z9-14:OAc<br>Z9E12-14:OAc<br>E9-14:OAc                                                             | 2  |
| 18 | <i>Spodoptera albula</i> Walker         | Z9-14:OAc<br>Z9E12-14:OAc<br>Z9-14:OH<br>Z11-16:OAc                                                | 14 |

## References

- 1 Lalanne Cassou, B., Silvain, J., Monti, L. & Malosse, C. Description of a new species of *Spodoptera* from French Guiana: *Spodoptera descoinsi* (Lepidoptera: Noctuidae: Amphipyriinae), discovered with sexual attractants. *Annales de la Societe Entomologique de France (France)* (1994).
- 2 Champion, D. Sex pheromones and their uses for control of insects of the genus *Spodoptera* in *Internationaal Symposium over Fytofarmacie en Fytiatrie* (1975).
- 3 Kurihara, M., Usui, K., Uchiumi, K. & Tatsuki, S. Sex-pheromone of the lawn grass cutworm moth, *Spodoptera depravata* (Butler) (Lepidoptera, Noctuidae). *Appl. Entomol. Zool.* **35**, 323-324 (1991).

- 4 Monti, L., Lalanne-Cassou, B., Lucas, P., Malosse, C. & Silvain, J.-F. Differences in sex pheromone communication systems of closely related species: *Spodoptera latifascia* (walker) and *S. descoinsi* lalanne-cassou & silvain (Lepidoptera: Noctuidae). *J. Chem. Ecol.* **21**, 641-660 (1995).
- 5 Teal, P., Mitchell, E., Tumlinson, J., Heath, R. & Sugie, H. Identification of volatile sex pheromone components released by the southern armyworm, *Spodoptera eridania* (Cramer). *J. Chem. Ecol.* **11**, 717-725 (1985).
- 6 Cork, A., Murlis, J. & Megenasa, T. Identification and field testing of additional components of female sex pheromone of African armyworm, *Spodoptera exempta* (Lepidoptera: Noctuidae). *J. Chem. Ecol.* **15**, 1349-1364 (1989).
- 7 Acín, P., Rosell, G., Guerrero, A. & Quero, C. Sex pheromone of the Spanish population of the beet armyworm *Spodoptera exigua*. *J. Chem. Ecol.* **36**, 778-786 (2010).
- 8 Unbehend, M. *et al.* Geographic variation in sexual attraction of *Spodoptera frugiperda* corn-and rice-strain males to pheromone lures. *PLOS ONE* **9**, e89255 (2014).
- 9 Munoz, L., Rosell, G., Quero, C. & Guerrero, A. Biosynthetic pathways of the pheromone of the Egyptian armyworm *Spodoptera littoralis*. *Physiol. Entomol.* **33**, 275-290 (2008).
- 10 Sun, F. & Hu, Y. The sex pheromone communication system of *Spodoptera litura* (Fabricius). *Acta. Entomol. Sin.* **45**, 404-407 (2001).
- 11 Van Hai, T., Son, P. K., Inomata, S.-I. & Ando, T. Sex attractants for moths of Vietnam: Field attraction by synthetic lures baited with known lepidopteran pheromones. *J. Chem. Ecol.* **28**, 1473-1481 (2002).
- 12 Landolt, P. J., Smithhisler, C., Adams, T. & Zack, R. S. An improved multi - component sex attractant for trapping male western yellowstriped armyworm, *Spodoptera praefica* (Grote) (Lepidoptera: Noctuidae). *Agric. For. Entomol.* **5**, 333-339 (2003).
- 13 Bestmann, H., Attygalle, A., Schwarz, J., Vostrowsky, O. & Knauf, W. Identification of sex pheromone components of *Spodoptera sunia* Guenée (Lepidoptera: Noctuidae). *J. Chem. Ecol.* **14**, 683-690 (1988).
- 14 Meagher, R. L., Brambila, J. & Hung, E. Monitoring for exotic *Spodoptera* species (Lepidoptera: Noctuidae) in Florida. *Fla. Entomol.* **91**, 517-522 (2008).

**Table S2:** Polymerase Chain Reaction primers used in this study.

| <b>Forward (5'-3')</b>                                      | <b>Reverse (5'-3')</b>                                          | <b>Application</b>                  |
|-------------------------------------------------------------|-----------------------------------------------------------------|-------------------------------------|
| Os_F1_deg:<br>ACN GGH TTY MTD GGV AA                        | FAR_Gen_R:<br>GMTTTKGTGTANGYRTAYGTRTTHGG                        | Degenerate PCR                      |
| Os_F2_deg:<br>YAYRTDTCBACWGCHTA                             | FAR_Gen_R:<br>GMTTTKGTGTANGYRTAYGTRTTHGG                        | Degenerate PCR                      |
| FAR_LAT_F:<br>ACNGGNGSNACNGGNTT                             | FAR_Gen_R:<br>GMTTTKGTGTANGYRTAYGTRTTHGG                        | Degenerate PCR                      |
| Os_F1_deg:<br>ACN GGH TTY MTD GGV AA                        | Os_R2_deg:<br>RTADGCWGTVGAHAYRT                                 | Degenerate PCR                      |
| Sex_FARI_RACE_F1:<br>ATGTCGCAGCCAATGTTTCAGTTT               | Sex_FARI_RACE_R1:<br>TAGGCTGTGGAAATATGGACAAATGC                 | RACE                                |
| Sex_FARI_RACE_F2:<br>GGCATTGTCCATATTTCCACAG                 | Sex_FARI_RACE_R2:<br>AAACTGAACATTGGCTGCGACA                     | Nested RACE                         |
| SlitFARI_RACE_F1:<br>ATGTGGCAGCCAGTGTCCAGTTT                | SlitFARI_RACE_R1:<br>TAGGCGGTGGACACATGGACAAAGGC                 | RACE                                |
| SlitFARI_RACE_F2:<br>GGCCTTTGTCCATGTGTCCACCG                | SlitFARI_RACE_R2:<br>AAACTGGACACTGGCTGCCACA                     | Nested RACE                         |
| SexpgFARI_FL_F:<br>TAAAATGACGTATAGACAAATAAATG               | SexpgFARI_FL_R:<br>TTAACTACGTTTCTTCATTAAGAACT                   | Functional gene expression          |
| SlitpgFARI_FL_F:<br>TAAAATGACGTATAGACAAATAAATG              | SlitpgFARI_FL_Rev<br>TCT TTA AAT TAA TAA ATT ATG TAC            | Functional gene expression          |
| SlitpgFAR II_RACE_F<br>GTGGTCATTCAGCAGCCACA                 | SlitpgFAR II_RACE_R<br>CCAGTTCGCCAGCCAGCCTC                     | RACE                                |
| SexpgFARII_RACE_F<br>GTGGTCATCCATTCAGCAGCAACT               | SexpgFARII_RACE_R<br>CCAGTTCGCCAACCAGCCCC                       | RACE                                |
| SlitpgFARII_FL_F<br>ATGGTTGTGTTGACTTCGAA                    | SlitpgFARII_FL_R<br>TTA TTT TAT CTT TTC CAA AAA C               | Functional gene expression          |
| SexpgFARII_FL_F<br>ATGGTTGTGTTGACTTCGAA                     | SexpgFARII_FL_R<br>TTATTTTTTTTTTTCCAAAAAC                       | Functional gene expression          |
| SexpgFARIqrt_F:<br>TTCCTTCAGCAGCCACAGCA                     | SexpgFARIqrt_R:<br>CCTTCGCCGAGAAGCACTC                          | Quantitative PCR                    |
| SexpgFARIIqrt_F:<br>GAT CAG AGA GAA AAA GGG AC              | SexpgFARIIqrt_R:<br>GTA TGC TGT CGA TAT GTG GAT G               | Quantitative PCR                    |
| Sp_beta actin_F:<br>CCGTCCCCATCTACGAAGGTTACG                | Sp_beta actin_R:<br>GCGGTGGCCATCTCCTGCTC                        | House-keeping gene/quantitative PCR |
| Bmori_pgFRA_F:<br>GAT CCA AGA TGT CAC ACA ATG<br>GAA CTT TG | Bmori_pgFRA_R:<br>CTA TAA TTT ATT TTT GAA CAG ATG<br>CTT GTT GA | Functional gene expression          |

# Supporting information

## Two fatty acyl reductases involved in moth pheromone biosynthesis

Antony et al.,

### S1 Materials and Methods

**Chemicals.** Tetradecanoic acid methyl ester (C14:COOMe) and hexadecanoic acid Me (C16:COOMe) were purchased from Sigma (Dorset, England). Pentadecyl acetate (15:OAc), (*E*)-14-hexadecenoic acid Me (*E*14-16:COOMe), (*Z*)-9-tetradecenoic acid Me (*Z*9-14:COOMe), (*E*)-12-tetradecenoic acid Me (*E*12-14:COOMe), (*Z*)-12-tetradecenoic acid Me (*Z*12-14:COOMe), (*Z*)-9-hexadecenoic acid Me (*Z*9-16:COOMe), (*E*)-11-tetradecenoic acid Me (*E*11-14:COOMe), (*Z*)-11-tetradecenoic acid Me (*Z*11-14:COOMe), (*Z*)-11-hexadecenoic acid Me (*Z*11-16:COOMe), (*E*)-11-hexadecenoic acid Me (*E*11-16:COOMe), (*Z,Z*)-9,11-tetradecadienyl acid Me (*Z*9*Z*11-14:COOMe), (*Z,E*)-9,11-tetradecadienyl acid Me (*Z*9*E*11-14:COOMe), (*Z,E*)-9,12-tetradecadienyl acid Me (*Z*9*E*12-14:COOMe), (*E,E*)-10,12-tetradecadienyl acid Me (*E*10*E*12-14:COOMe), (*Z,Z*)-9,12-tetradecadienyl acid Me (*Z*9*Z*12-14:COOMe) and the corresponding fatty alcohols (used as authentic standards) were purchased from Pest Control of India Private Limited (Mumbai, India) and Pherobank (Netherlands). (*Z*)-7-dodecenyl acid Me (*Z*7-12:COOMe), (*Z*)-5-decenyl acid Me (*Z*5-10:COOMe), and the corresponding alcohols were kindly provided by the pheromone group of Lund University.

**Functional Assay and GC-MS analysis.** The functional assays were carried out in a yeast expression system following the procedures we previously described<sup>15,16,17</sup>. Briefly, the open reading frames of the *S. exigua*, *S. littoralis* and *B mori* *pgFAR* genes were cloned into the shuttle vector pYES2.1/V5-His TOPO (Invitrogen), and the resulting recombinant vectors were used to transform yeast of the INVSc1 strain of *S. cerevisiae* (Invitrogen). When testing the conversion of individual precursors, aliquots of yeast cultures were suspended in induction medium containing 0.5 mM of the FAME methyl-ester precursor diluted in ethanol, and fatty alcohol products were extracted and analysed by gas chromatography-mass spectrometry under the conditions described below. When testing the alcohol production of yeast supplemented with precursor blends in the ratio as found in female pheromone glands<sup>7,9</sup> the total concentration of precursors was 0.5 mM and the culture medium was 5 ml, whereas all other parameters were kept unchanged.

Yeast cell extracts were subjected to GC-MS analysis on a Agilent 7850A GC coupled to a mass detector (Agilent 5975C) and equipped with a medium-polar INNOWax column (100% polyethylene glycol, 30 × 0.25 mm I.D., film thickness 0.25 mm, Agilent Technologies, USA). The GC-MS was operated in electron impact mode (70 eV), the injector was configured in splitless mode at 220°C, and helium was used as carrier gas (velocity: 30 cm/s). The oven temperature was set to 80°C for 1 min, then increased at a rate of 10°C/min up to 210°C, followed by a hold at 210°C for 15 min, and then increased at a rate of 10°C/min up to 230°C, followed by a hold at 230°C for 20 min.

- 15 Lassance, J. M. *et al.* Functional consequences of sequence variation in the pheromone biosynthetic gene *pgFAR* for *Ostrinia* moths. *Proc. Natl. Acad. Sci. USA* **110**, 3967-3972, doi:10.1073/pnas.1208706110 (2013).
- 16 Lassance, J.-M. *et al.* Allelic variation in a fatty-acyl reductase gene causes divergence in moth sex pheromones. *Nature* **466**, 486-489 (2010).

- 17 Liénard, M. A., Hagström, Å. K., Lassance, J.-M. & Löfstedt, C. Evolution of multicomponent pheromone signals in small ermine moths involves a single fatty-acyl reductase gene. *Proc. Natl. Acad. Sci. USA* **107**, 10955-10960 (2010).
